# Supplementary material for: Structural insights into translational recoding by frameshift suppressor tRNASufJ
Source: PubMed Central journal article supplement — RNA. 2014 Dec;20(12):1944–54. doi: 10.1261/rna.046953.114 (PMC4238358; doi:10.1261/rna.046953.114), 2014-12
Supplement: supp_046953.114_SuppFigures.pdf [file supp_046953.114_SuppFigures.pdf]

**Structural insights into translational recoding by frameshift  
suppressor tRNA<sup>SufJ</sup>**

Crystal E. Fagan, Tatsuya Maehigashi, Jack A. Dunkle, Stacey J. Miles and  
Christine M. Dunham\*

Department of Biochemistry, Emory University School of Medicine, 1510 Clifton  
Road NE, Suite G223, Atlanta, Georgia 30322 USA

\*Correspondence to [christine.m.dunham@emory.edu](mailto:christine.m.dunham@emory.edu) (CMD).

Contact Information: Christine M. Dunham, [christine.m.dunham@emory.edu](mailto:christine.m.dunham@emory.edu),  
phone +001 404 712 1756, fax +001 404 727 2738

Footnotes:

Running title: Structure of ASL<sup>SufJ</sup> bound to the ribosomal A site

PDB codes: 4TUA, 4TUB, 4TUC, 4TUD, 4TUE

**Keywords:** ribosome, mRNA, reading frame, anticodon stem-loop, decoding, X-ray crystal structure

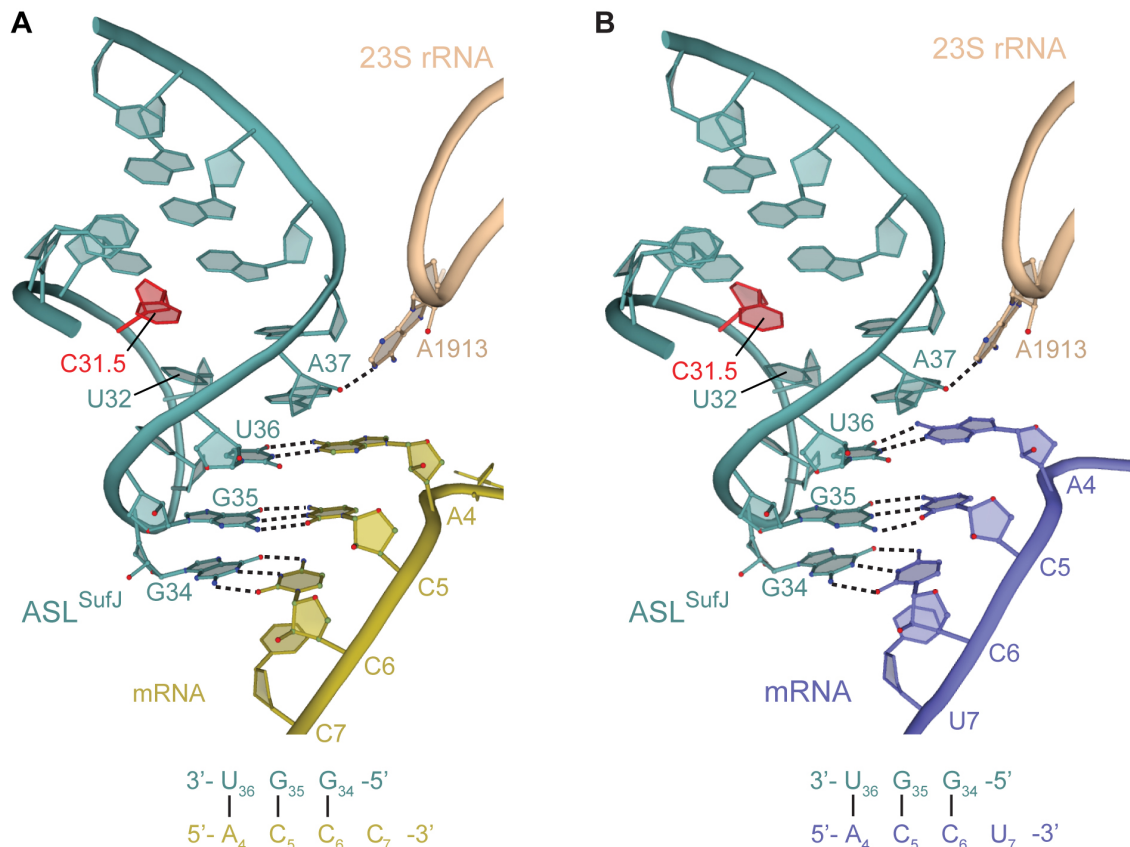

**Figure S1. ASL<sup>SufJ</sup> interactions with mRNA in the A site.** ASL<sup>SufJ</sup> (blue) forms three Watson-Crick base pairs with the first three nucleotides of the +1 suppressible codons **(A)** ACC-C (gold) and **(B)** ACC-U (dark blue) in the zero frame. These structures were solved with the antibiotic paromomycin. The C31.5 insertion (red) expands the anticodon loop to eight nucleotides. The ASL is stabilized by hydrogen bonding with 23S rRNA nucleotide A1913 (tan).

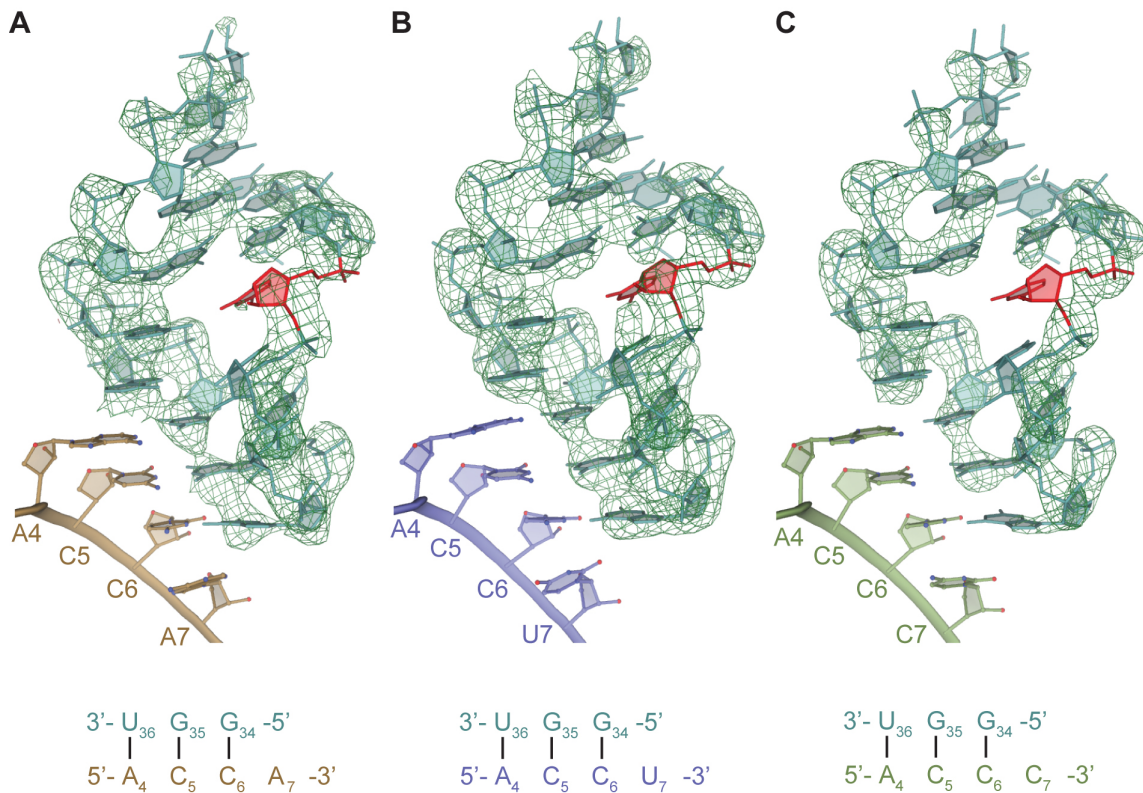

**Figure S2. Electron density maps for ASL<sup>SufJ</sup> bound to the A site.** Unbiased F<sub>o</sub>-F<sub>c</sub> electron density map for ASL<sup>SufJ</sup> (blue) bound to the +1 suppressible codons **(A)** ACC-A **(B)** ACC-U and **(C)** ACC-C shows strong density for nucleotides 29-42 (contoured at 3  $\sigma$ ). The 70S structures containing the **(B)** ACC-U and **(C)** ACC-C codons contain the antibiotic paromomycin while the 70S structure containing the **(A)** ACC-A codon is without.

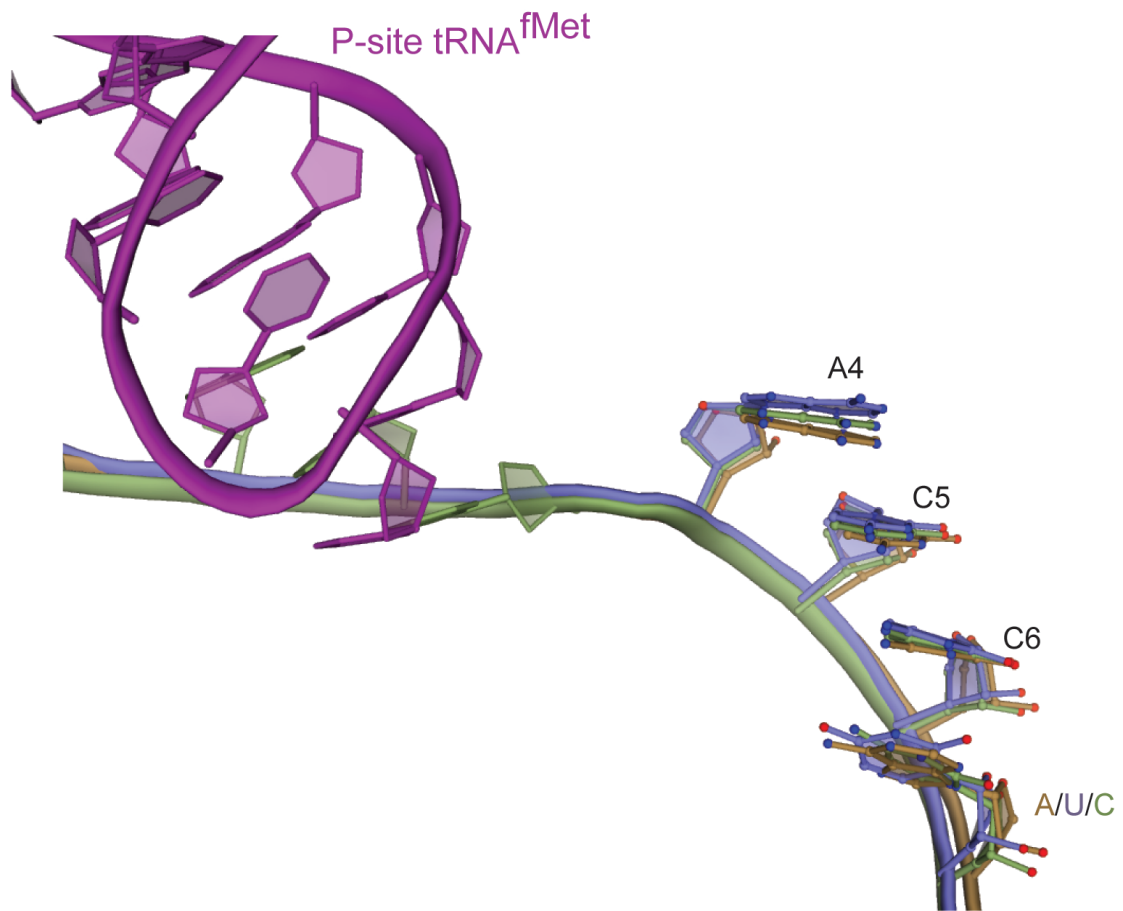

**Figure S3. The mRNA path of each +1 suppressible codon is similar.** The mRNA path is unaffected by the fourth nucleotide in the ACC-A (brown), ACC-U (dark blue) and ACC-C (green) codons. The P-site tRNA<sup>fMet</sup> is in magenta.

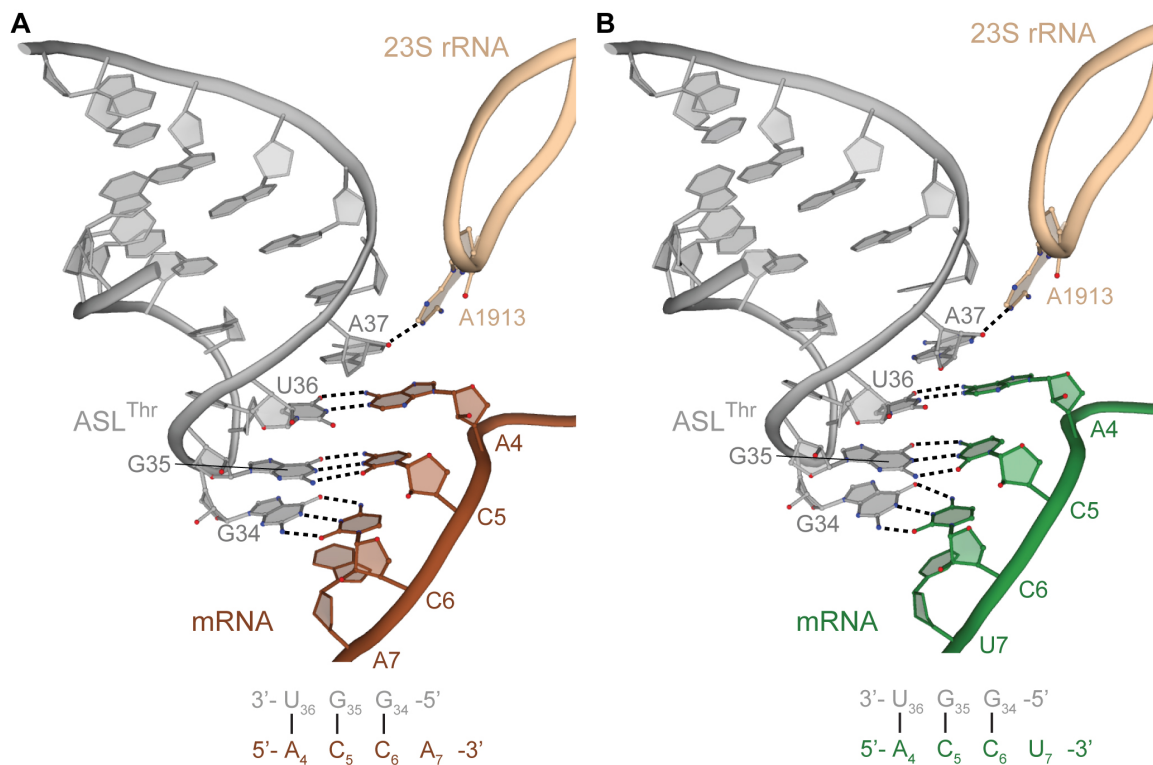

**Figure S4. ASL<sup>Thr</sup> interactions with mRNA in the A site.** ASL<sup>Thr</sup> (gray) forms three Watson-Crick base pairs with the first three nucleotides of the +1 suppressible codons **(A)** ACC-A (brown) and **(B)** ACC-C (green) in the zero frame. These structures were solved with the antibiotic paromomycin. The ASL is stabilized by a hydrogen bonding with 23S rRNA nucleotide A1913 (tan).
